# Supplementary material for: Pemt Deficiency Ameliorates Endoplasmic Reticulum Stress in Diabetic Nephropathy
Source: PubMed Central journal article supplement (PMC3965443; doi:10.1371/journal.pone.0092647), 2014-03-25

Figure S1

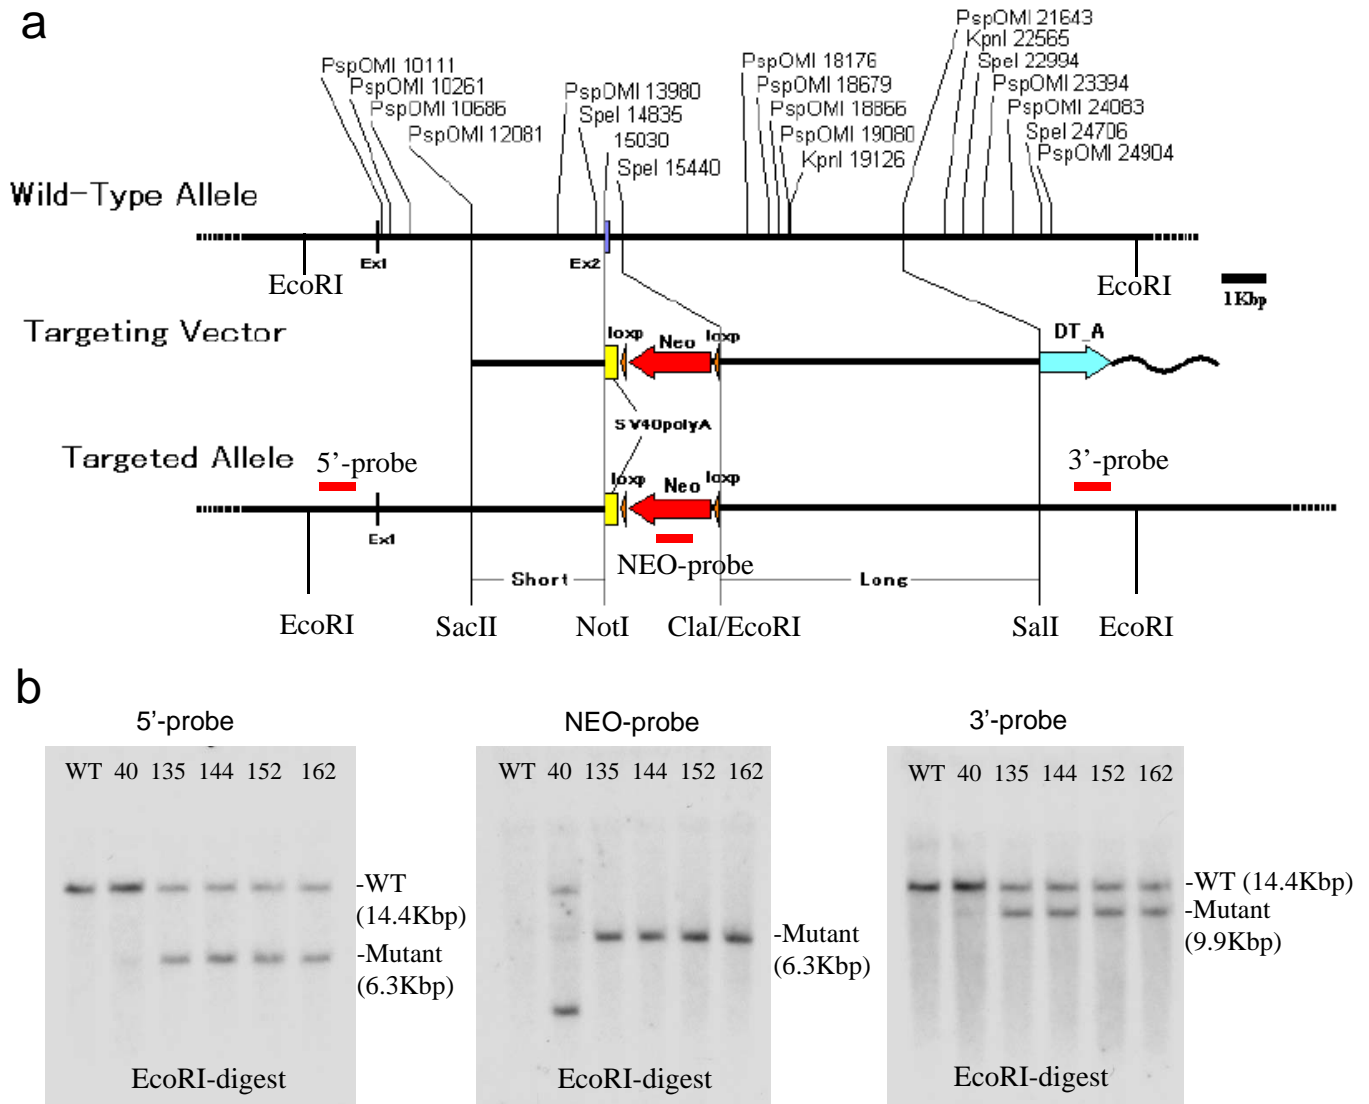

Figure S2

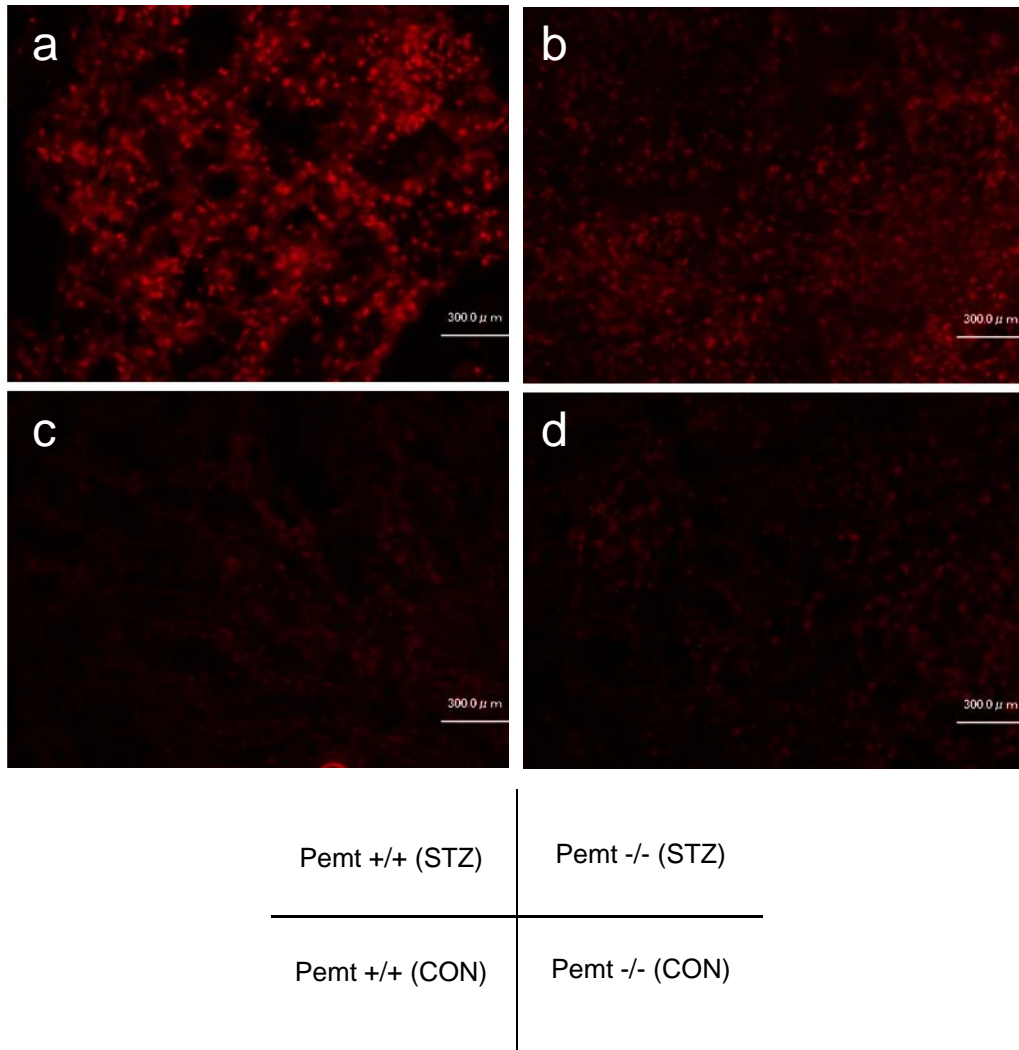

Figure S3

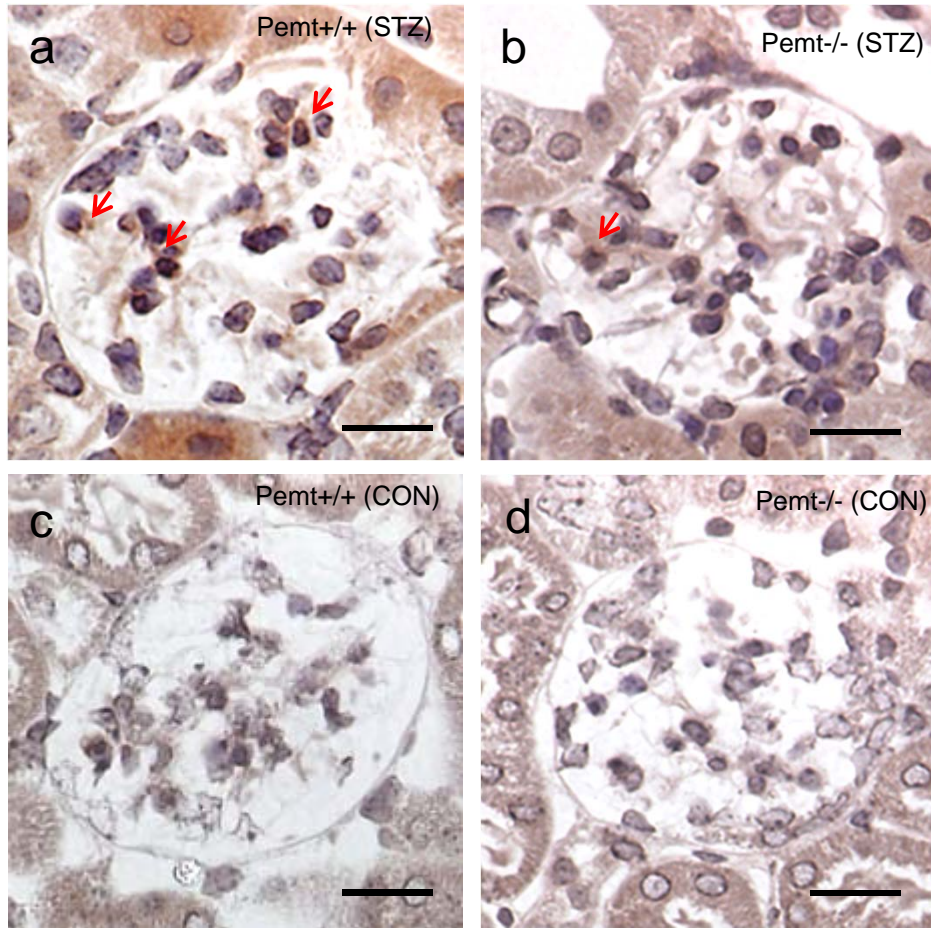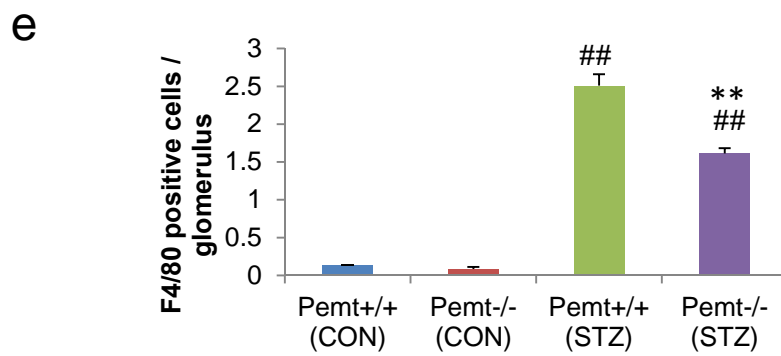

Figure S4

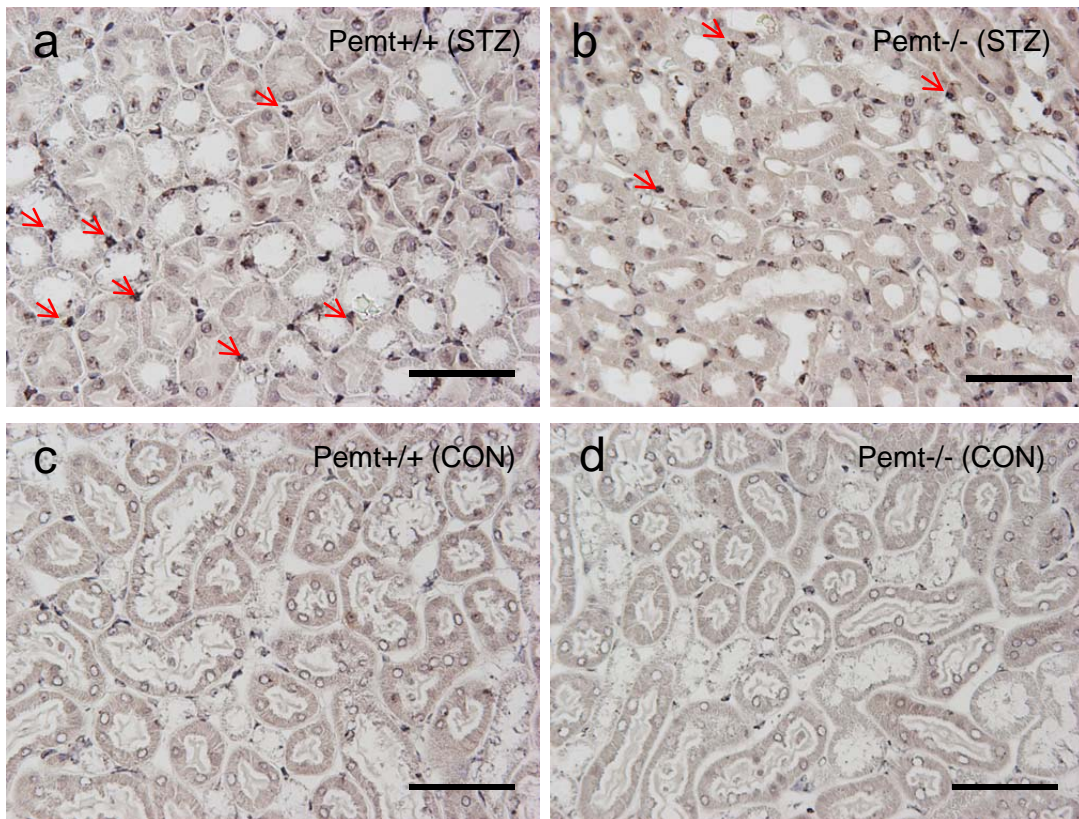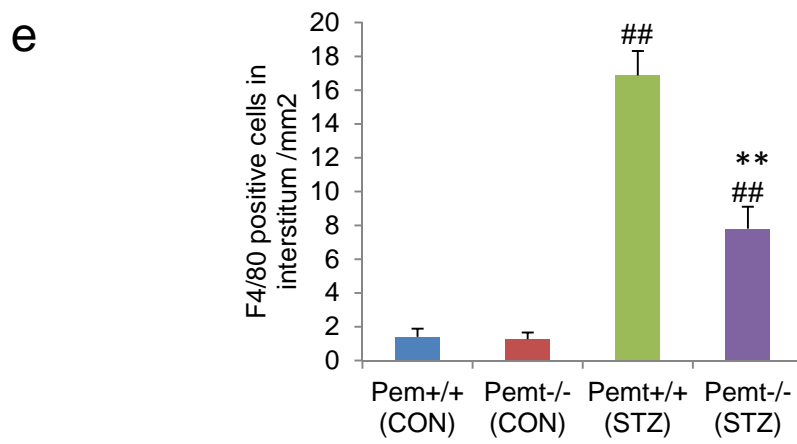

Figure S5

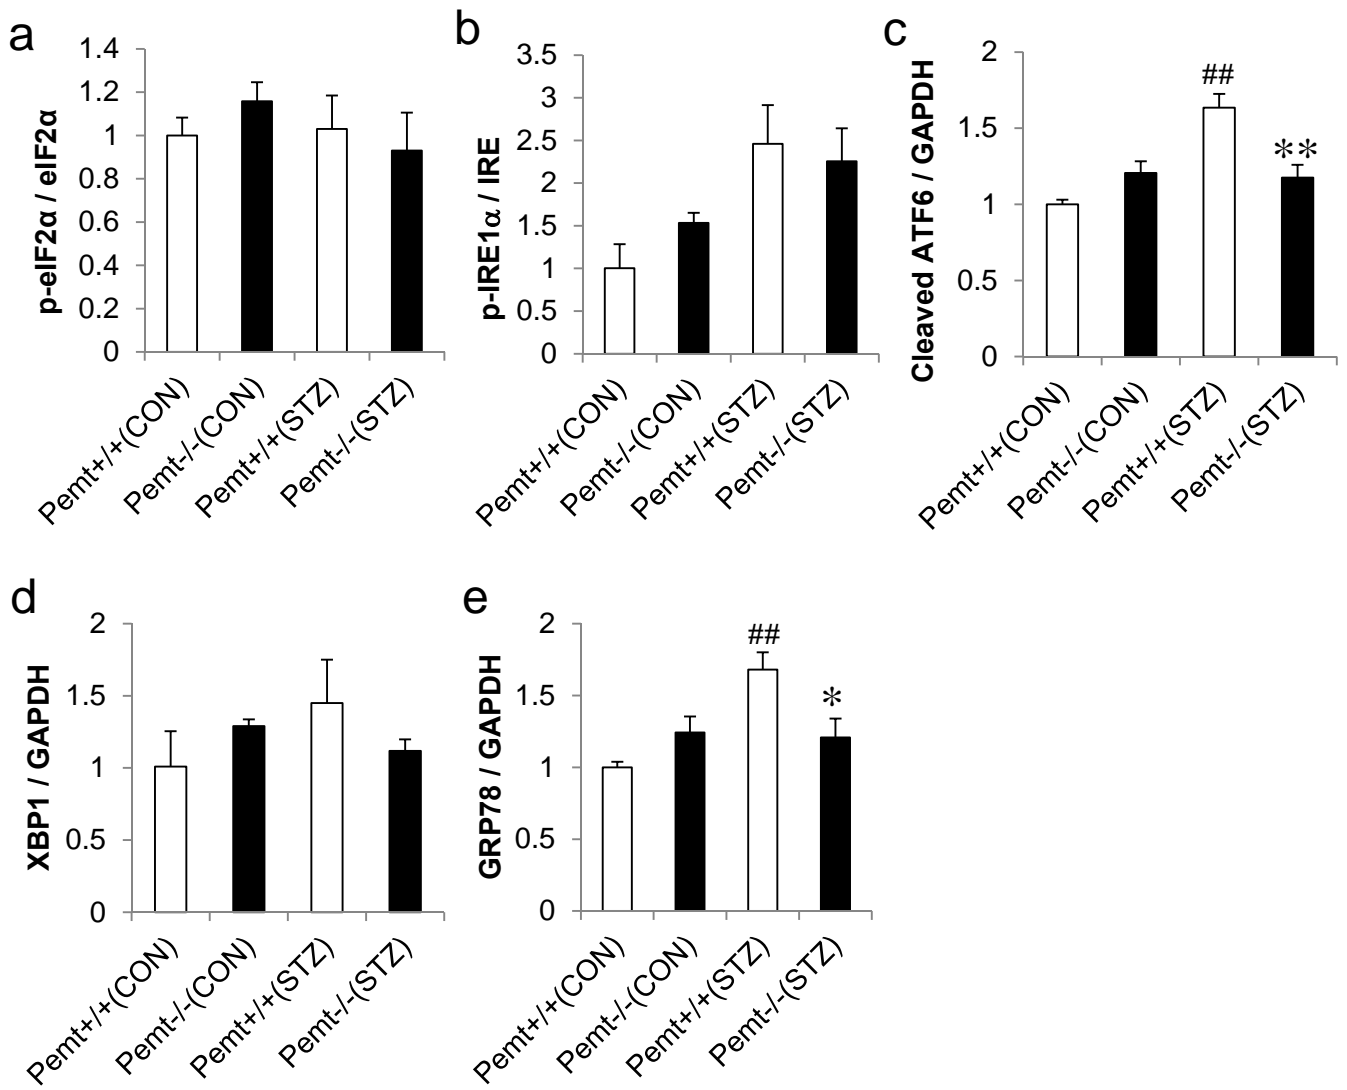

Figure S6

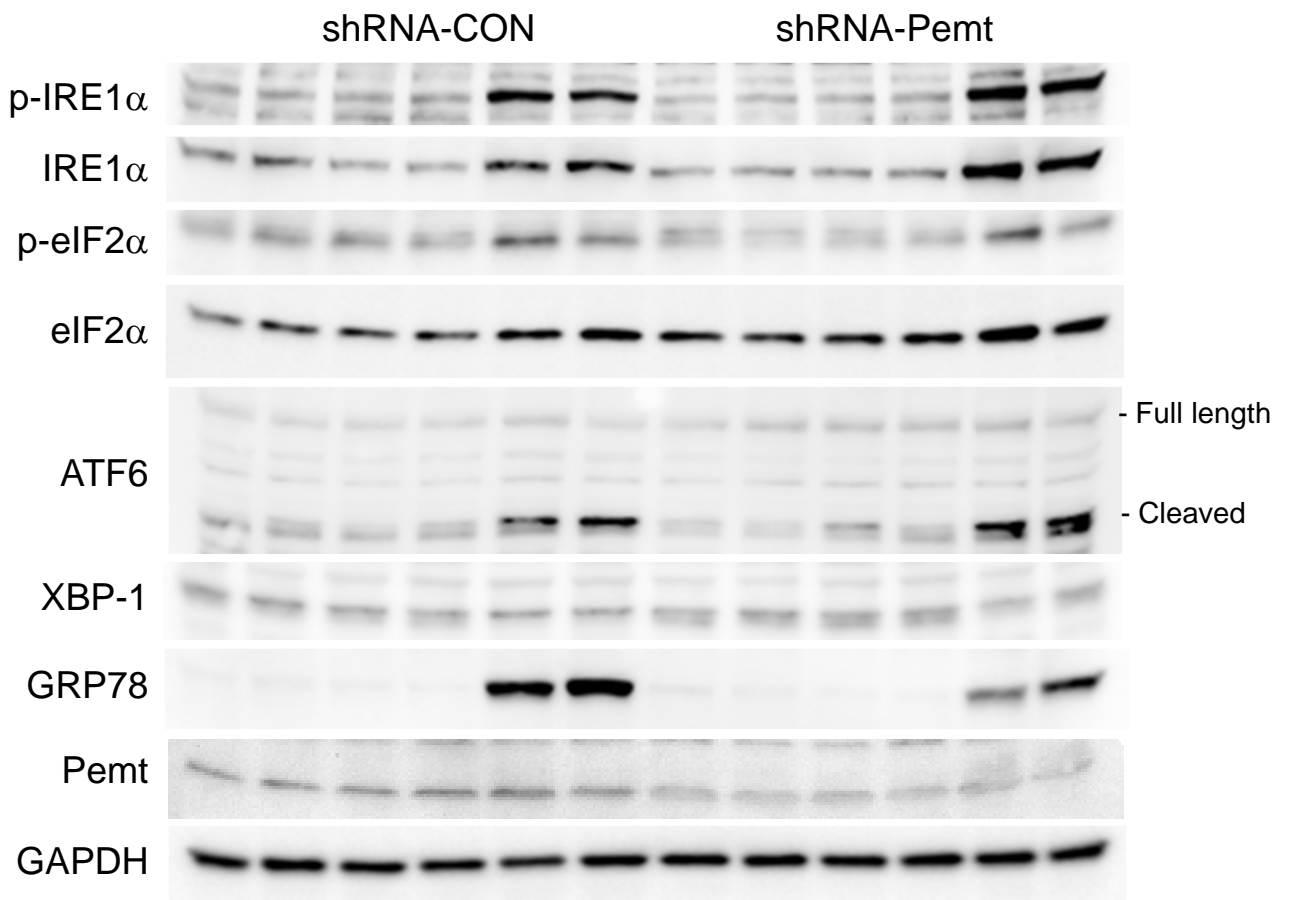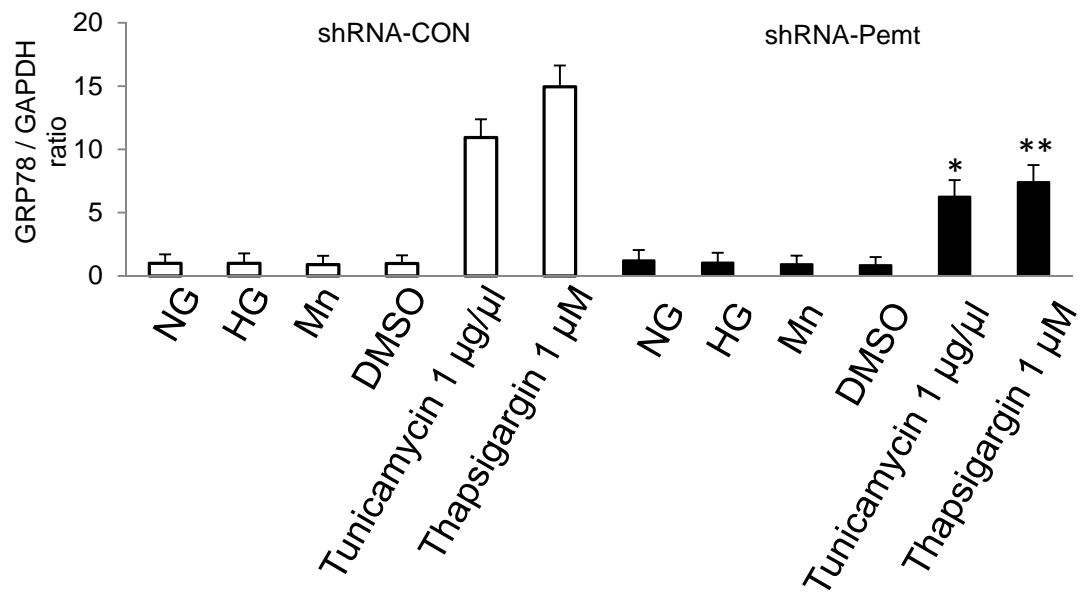

Figure S7

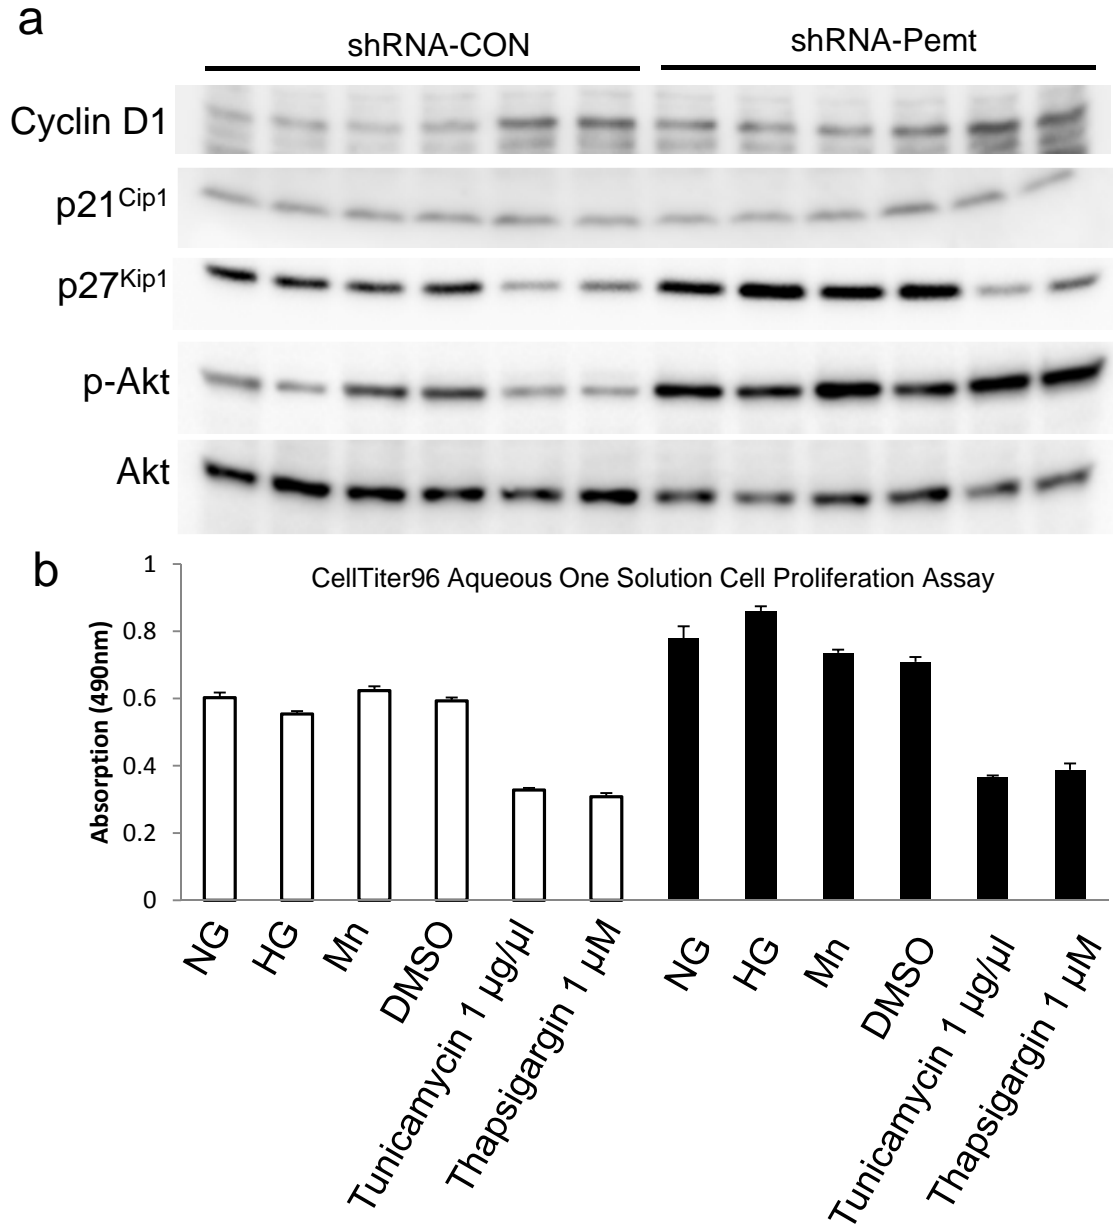

Figure S8

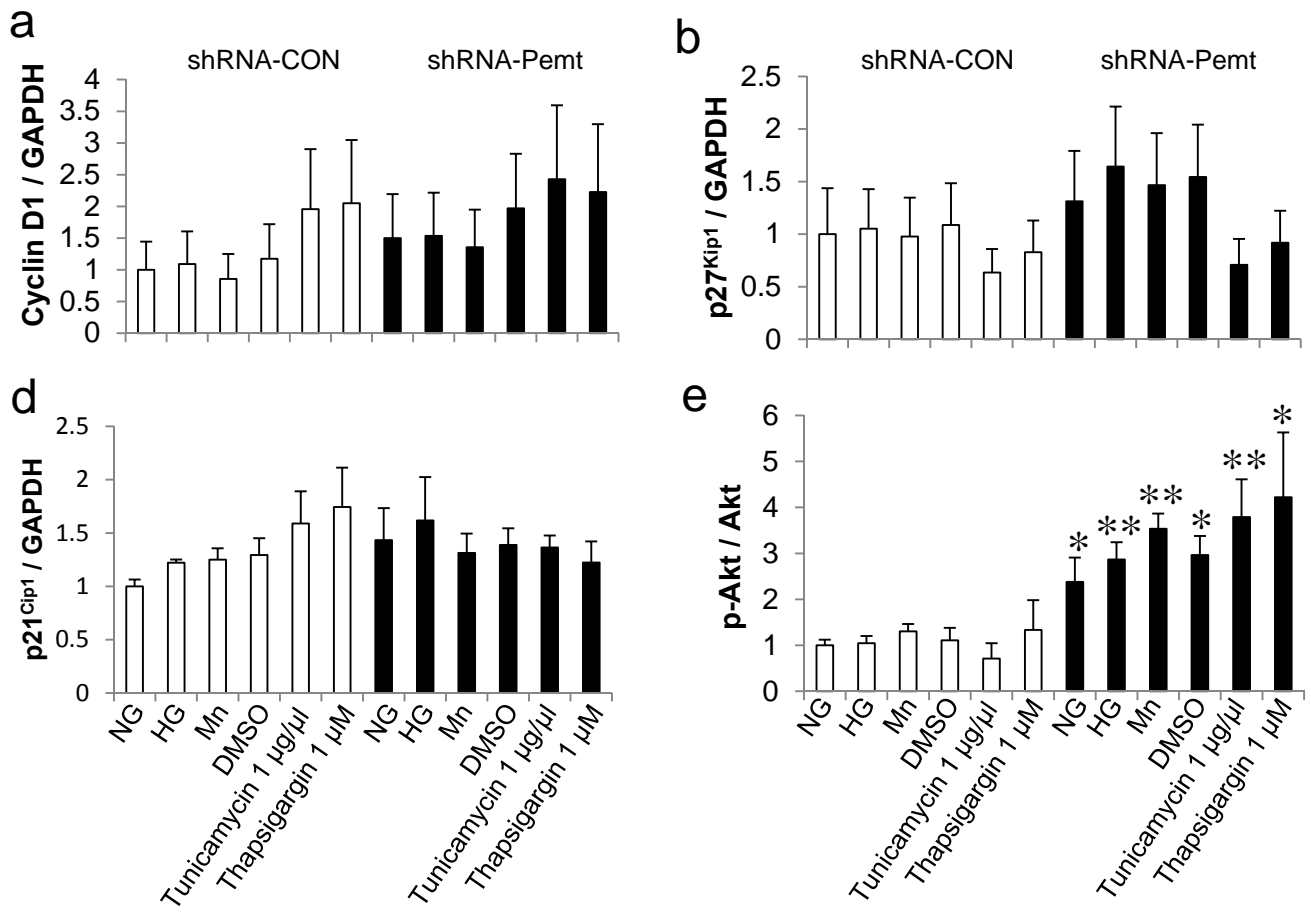



Figure S9

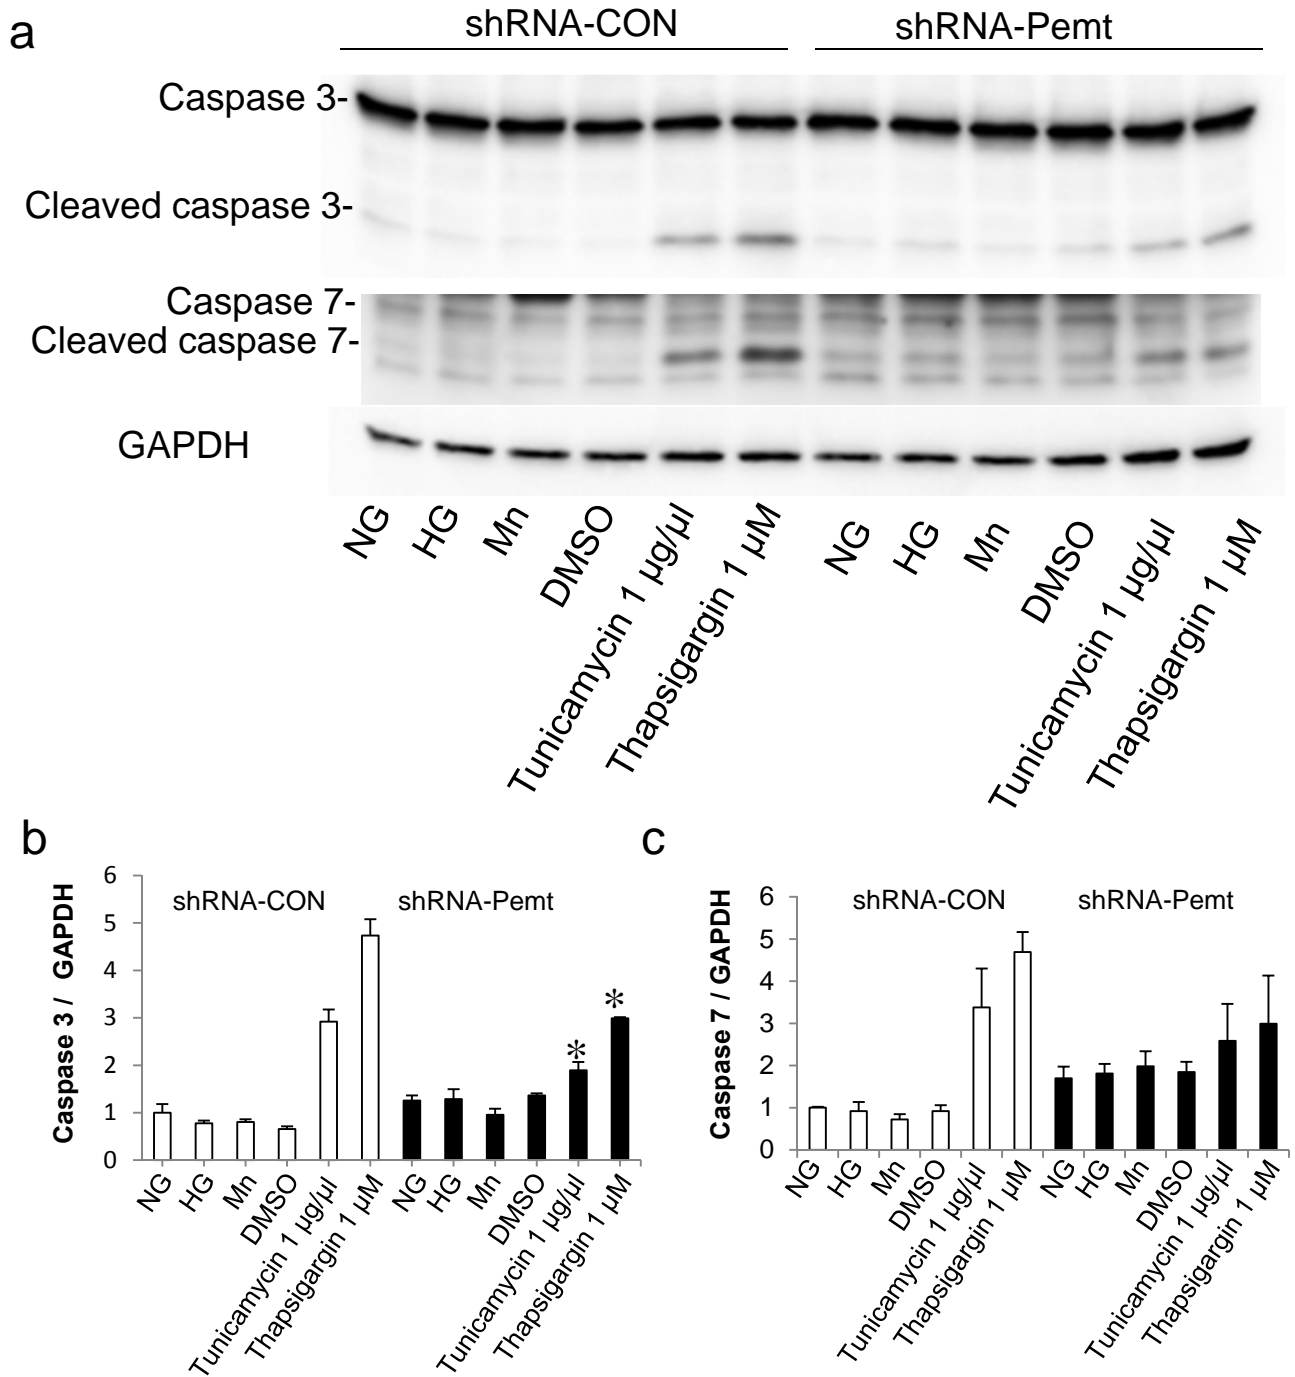

Supplement: pone.0092647.s001.pdf [file pone.0092647.s001.pdf]
